# Supplementary material for: The impact of MgO nanoparticle interface in ultra-insulating polyethylene nanocomposites for high voltage DC cables
Source: Royal Society of Chemistry journal article supplement (doi:10.1039/c6ta02041k), 2016-01-01

## Supplementary Information

### S1 - X-ray photospectroscopy (XPS)

#### O 1s -peak

#### UN-MgO

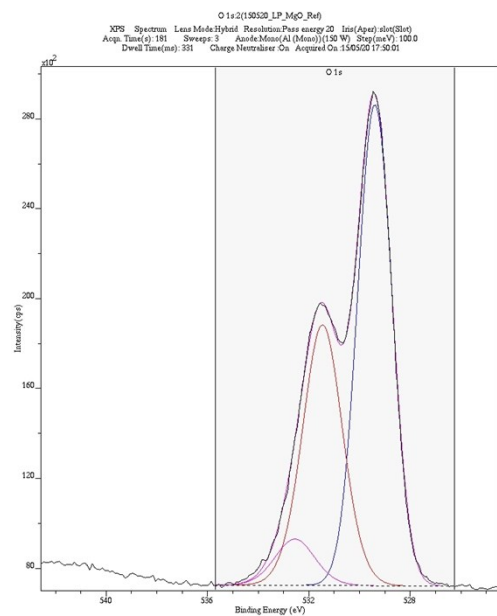

#### C8-MgO

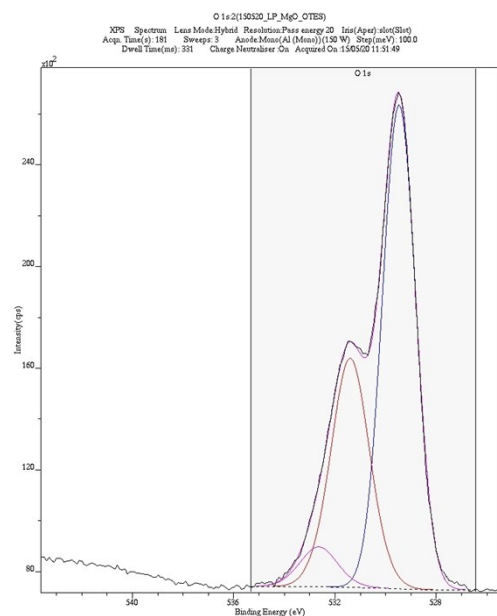

# C18-MgO

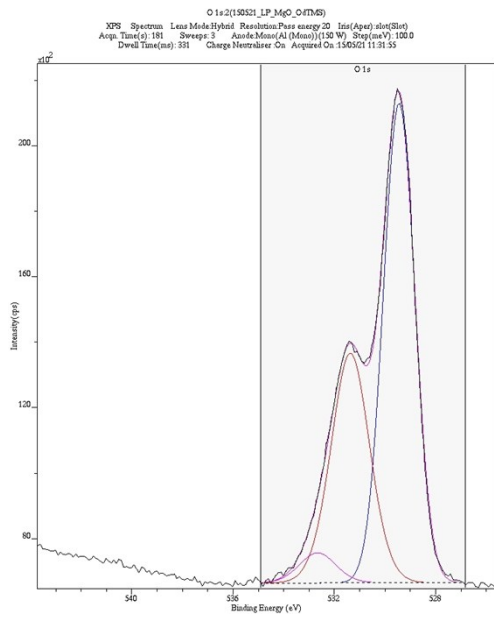

S2 – Analyzed SEM-image changed to bitmap for Bootstrap statistics

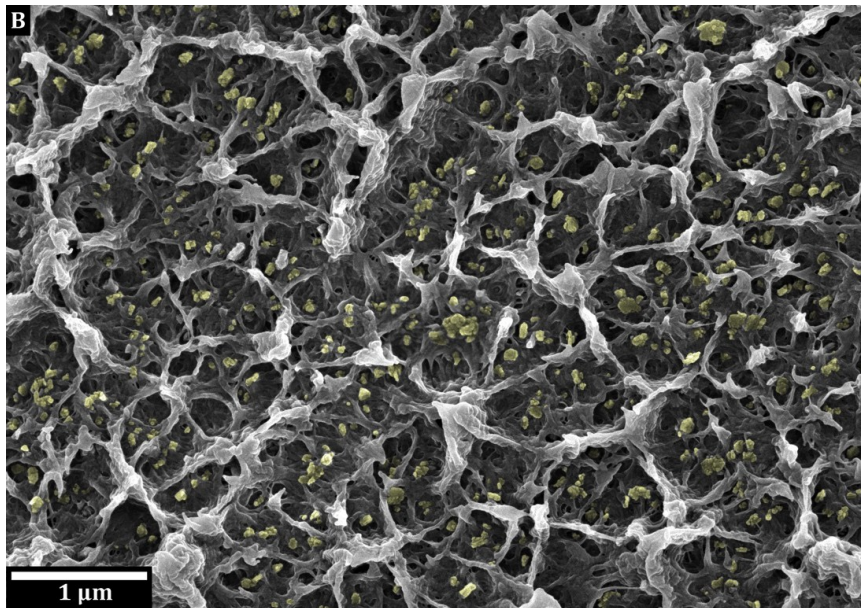

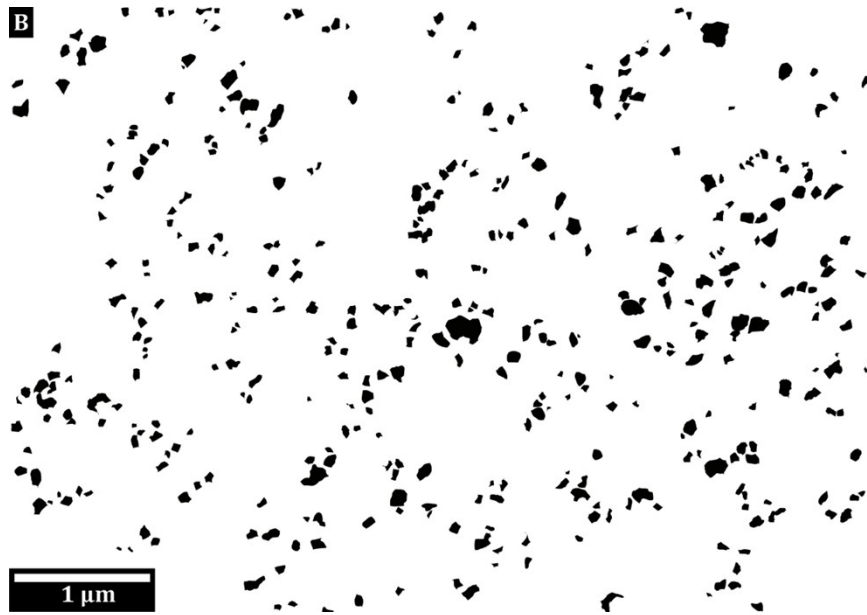

S3 – Heat flow rate for the crystallization as acquired at a cooling of 10 °C/min in differential scanning calimetry.

UN-MgO

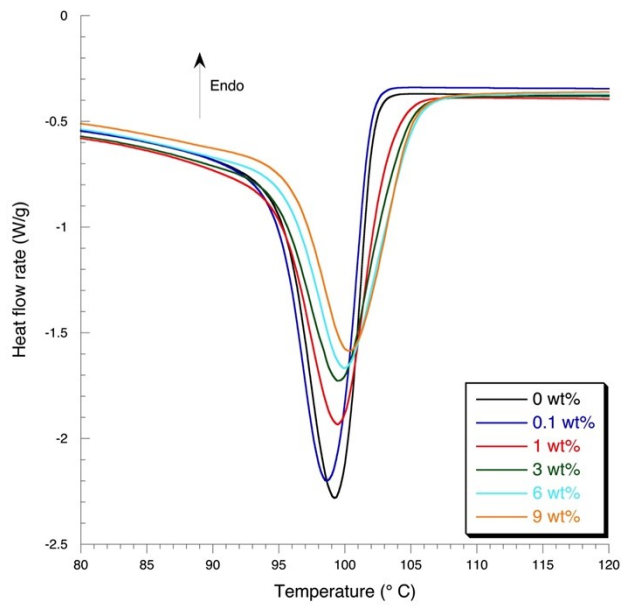

C8-MgO

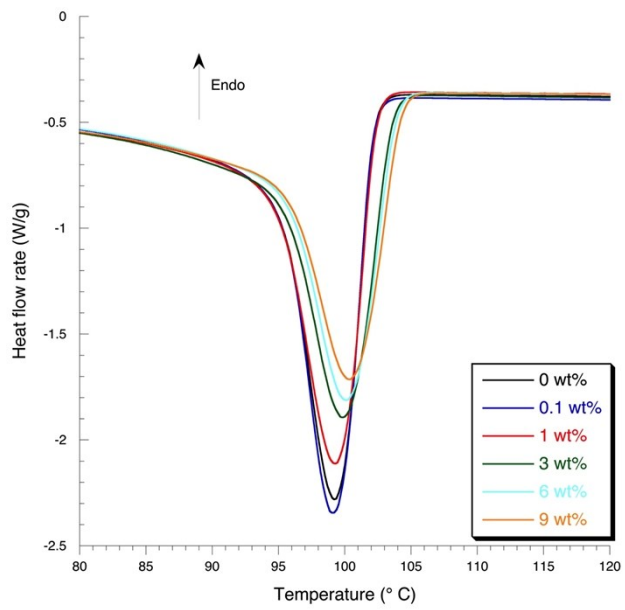

### C18-MgO

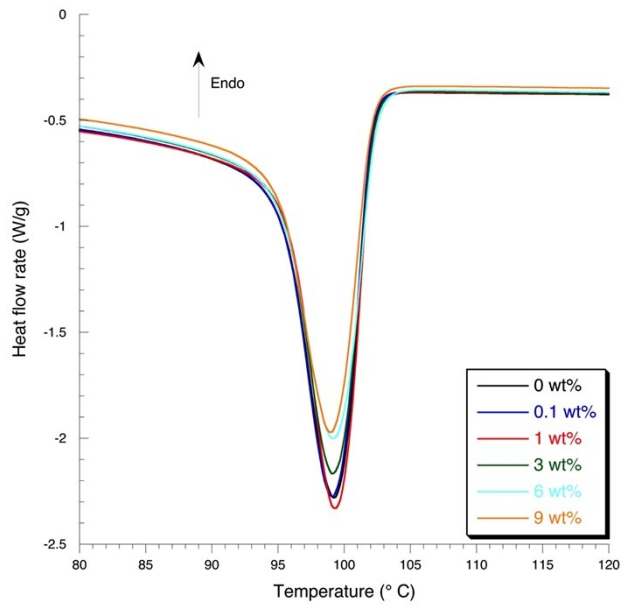

Supplement: c6ta02041k1.pdf [file c6ta02041k1.pdf]
